# Supplementary material for: Capsaicin Synthesis Requires in Situ Phenylalanine and Valine Formation in in Vitro Maintained Placentas from Capsicum chinense
Source: MDPI journal article supplement (doi:10.3390/molecules21060799), 2016-06-21
Supplement: s1 [file s1]

# Supplementary Materials: Capsaicin Synthesis Requires *in situ* Phenylalanine and Valine Formation in *in vitro* Maintained Placentas from *Capsicum chinense*

Fray M. Baas-Espinola, Lizbeth A. Castro-Concha, Felipe A. Vázquez-Flota and María L. Miranda-Ham

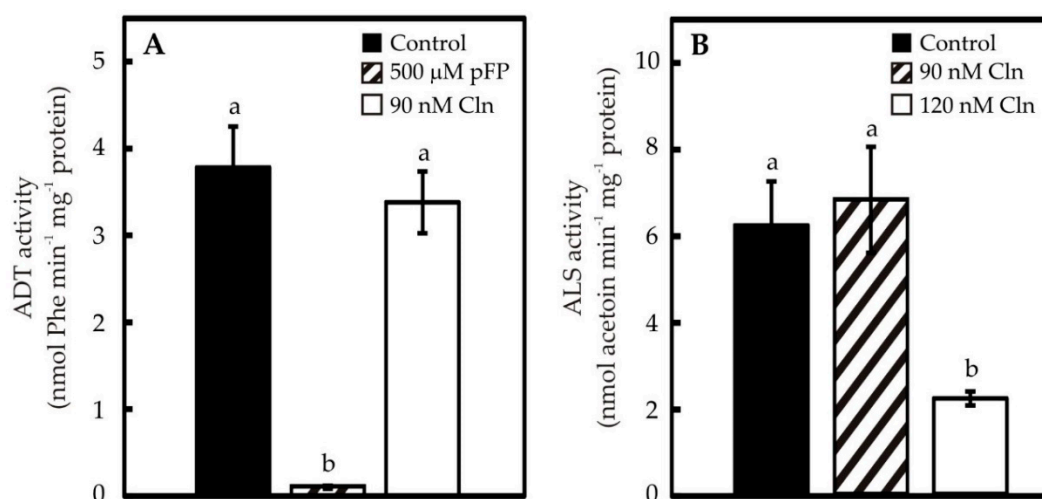

**Figure S1.** ADT (A) and ALS (B) specific activities in placentas treated with either p-FP or Cln to demonstrate inhibitors' specificities. Bars labeled with different letters are significantly different (Tukey's test, α = 0.05).

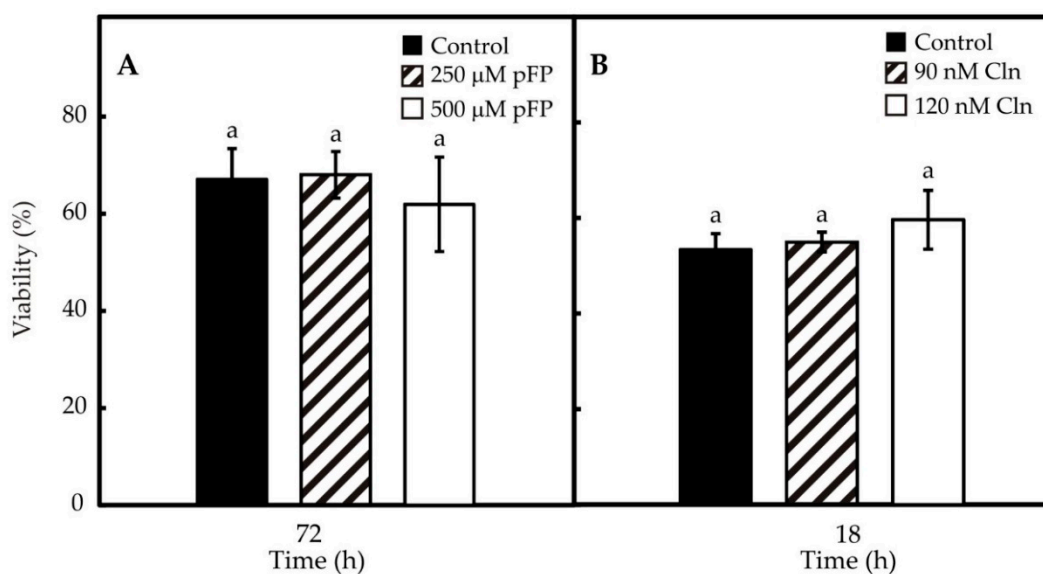

**Figure S2.** Viability of *in vitro* maintained placentas that were subjected to the inhibition treatments. (A) p-FP and (B) Cln. Bars labeled with different letters are significantly different (Tukey's test, α = 0.05).
